# Supplementary material
Source: MDPI journal article supplement (https://www.mdpi.com/2673-4184/4/2/10)
Supplement: s1 [file s1]

## Supplementary Material

**Table S1.** Database search results for 13/12/2022.

| <b>Databases</b>                                | <b>Results (DS)</b> | <b>Results (IF)</b> |
|-------------------------------------------------|---------------------|---------------------|
| <i>PubMed</i>                                   | 16                  | 16                  |
| <i>Cochrane CENTRAL (Trials)</i>                | 159                 | 159                 |
| <i>ScienceDirect</i>                            | 9                   | 9                   |
| <i>Scielo</i>                                   | 15                  | 15                  |
| <i>VHL</i>                                      | 4                   | 4                   |
| <i>PEDro</i>                                    | 2                   | 2                   |
| <b>TOTAL</b>                                    | 205                 | 205                 |
| DS- Author Diana Silva; IF- Author Ivo Ferreira |                     |                     |
